# Supplementary material for: Genomic-assisted haplotype analysis and the development of high-throughput SNP markers for salinity tolerance in soybean
Source: PubMed Central journal article supplement (PMC4726057; doi:10.1038/srep19199), 2016-01-19
Supplement: srep19199-s1.pdf [file srep19199-s1.pdf]

# **Genomic-assisted haplotype analysis and development of high-throughput SNP markers for salinity tolerance in soybean**

Gunvant Patil<sup>1,#</sup>, Tuyen Do<sup>1,#</sup>, Tri D. Vuong<sup>1</sup>, Babu Valliyodan<sup>1</sup>, Jeong-Dong Lee<sup>2</sup>, Juhi Chaudhary<sup>1</sup>, J. Grover Shannon<sup>1</sup>, Henry T. Nguyen<sup>1,\*</sup>

**Supplementary Table S1: (A)** Phenotypic evaluation of chlorophyll concentration (SPAD ratio) and leaf scorch score (LSS) of 104 resequencing lines for salinity injury using cone-tainer method. Phenotype clusters were correlated with allelic variants. **(B)** List of top five SNPs significantly identified in SoySNP50K data, associated with LSS and SPAD based on EMMAX ( $-\log_{10} P \geq 7.3$ ) and  $r^2$  values.

**(A)**

| Seq Id*      | Accession* | Plant Id              | Phenotype |           |             |     | Phenotype Cluster# | Genotype |    |    | Genotype vs Phenotype |
|--------------|------------|-----------------------|-----------|-----------|-------------|-----|--------------------|----------|----|----|-----------------------|
|              |            |                       | SPAD - B^ | SPAD - A^ | SAPD Ratio^ | LSS |                    | M1       | M4 | M6 |                       |
| HN009        | PI 495017C | Beijing da qing don   | 35.75     | 35.64     | 1.00        | 1.0 | 1                  | C        | G  | T  | Matched               |
| HN013        | PI 661090  | S05-11482             | 37.96     | 38.10     | 1.00        | 1.1 | 1                  | C        | G  | T  | Matched               |
| HN015        | PI 437654  | Er-HNej-jA-           | 35.42     | 39.37     | 1.11        | 1.3 | 1                  | C        | G  | T  | Matched               |
| HN021        | PI 209332  | No. 4                 | 32.06     | 34.46     | 1.08        | 1.3 | 1                  | C        | G  | T  | Matched               |
| HN024        | PI 548316  | Cloud                 | 34.96     | 38.09     | 1.09        | 1.3 | 1                  | C        | G  | T  | Matched               |
| HN027        |            | S10-11227             | 34.84     | 34.27     | 0.98        | 1.3 | 1                  | C        | G  | T  | Matched               |
| <b>HN028</b> | PI 572239  | Holladay (S-100)      | 37.26     | 33.54     | 0.90        | 1.4 | 1                  | C        | G  | T  | Matched               |
| HN039        | PI 366121  |                       | 33.35     | 33.23     | 1.00        | 1.4 | 1                  | G        | C  | G  | Not Matched           |
| HN055        | PI 437679  | Nan-cou               | 30.54     | 30.10     | 0.99        | 1.5 | 1                  | C        | G  | T  | Matched               |
| HN056        | PI 437863A | DV-2841               | 32.84     | 33.40     | 1.02        | 1.4 | 1                  | C        | G  | T  | Matched               |
| HN058        | PI 458515  | Tie Zhugan            | 34.43     | 33.11     | 0.96        | 1.0 | 1                  | C        | G  | T  | Matched               |
| <b>HN063</b> | PI 483463  |                       | 35.04     | 32.79     | 0.94        | 1.0 | 1                  | C        | G  | T  | Matched               |
| HN067        | PI 548317  | Columbia (T38)        | 34.46     | 37.60     | 1.09        | 1.0 | 1                  | C        | G  | T  | Matched               |
| HN069        | PI 548415  | Sooty (PI 16790B)     | 32.71     | 34.75     | 1.06        | 1.3 | 1                  | C        | G  | T  | Matched               |
| HN074        | PI 561271  | Pei xian da quing dou | 35.38     | 35.86     | 1.01        | 1.1 | 1                  | C        | G  | T  | Matched               |
| HN075        | PI 567230  | WJK-PRC-23            | 28.96     | 33.10     | 1.14        | 1.3 | 1                  | C        | G  | T  | Matched               |
| HN079        | PI 567357  | Du jia qiao huang dou | 34.30     | 32.25     | 0.94        | 1.0 | 1                  | C        | G  | T  | Matched               |
| HN080        | PI 567383  | Da ke huang dou       | 34.22     | 33.68     | 0.98        | 1.2 | 1                  | C        | G  | T  | Matched               |
| HN085        | PI 567719  | Fu yang (43)          | 38.64     | 37.19     | 0.96        | 1.0 | 1                  | C        | G  | T  | Matched               |
| HN090        | PI 594512A | Bian zi jiang se dou  | 35.66     | 35.67     | 1.00        | 1.2 | 1                  | C        | G  | T  | Matched               |
| <b>HN105</b> | PI 438471  | Fiskeby III           | 38.65     | 35.45     | 0.92        | 1.2 | 1                  | C        | G  | T  | Matched               |
| HN008        | PI 437655  | Er-huan-jan           | 33.11     | 27.57     | 0.83        | 2.7 | 2                  | C        | G  | T  | Matched               |
| HN010        | PI 468915  |                       | 27.99     | 33.56     | 1.20        | 2.0 | 2                  | C        | G  | T  | Matched               |
| HN019        | PI 548402B |                       | 38.86     | 35.24     | 0.91        | 2.0 | 2                  | C        | G  | T  | Matched               |
| HN025        | PI 567516C | Ba yue zha            | 29.19     | 29.05     | 1.00        | 2.7 | 2                  | C        | G  | T  | Matched               |
| HN040        | PI 378702  |                       | 35.35     | 27.35     | 0.77        | 2.1 | 2                  | G        | G  | G  | Matched               |

|              |                  |                        |       |       |      |     |   |   |   |   |             |
|--------------|------------------|------------------------|-------|-------|------|-----|---|---|---|---|-------------|
| HN047        | PI 407729        |                        | 33.13 | 30.60 | 0.92 | 2.4 | 2 | C | G | T | Matched     |
| HN060        | PI 467312        | Cha-mo-shi-dou         | 34.79 | 30.75 | 0.88 | 2.8 | 2 | C | G | T | Matched     |
| HN076        | PI 567336B       | Lao hei dou            | 28.83 | 26.97 | 0.94 | 2.3 | 2 | C | G | T | Matched     |
| HN077        | PI 567343        | Ma huang dou           | 30.76 | 31.23 | 1.02 | 1.7 | 2 | C | G | T | Matched     |
| HN082        | PI 567611        | Ba yue zha             | 35.00 | 34.82 | 0.99 | 2.4 | 2 | C | G | T | Matched     |
| HN084        | PI 567690        | Fu yang (7)            | 36.74 | 33.31 | 0.91 | 2.0 | 2 | C | G | T | Matched     |
| HN086        | PI 567731        | Fu yang (56)           | 43.20 | 33.50 | 0.78 | 2.5 | 2 | C | G | T | Matched     |
| HN088        | PI 593258        | Macon                  | 37.63 | 27.13 | 0.72 | 2.6 | 2 | G | C | G | Not Matched |
| HN101        | PI 658519        | LD00-2817              | 31.27 | 27.73 | 0.89 | 2.6 | 2 | G | C | G | Not Matched |
| HN002        | PI 548402        | Peking                 | 34.56 | 23.04 | 0.67 | 3.6 | 3 | C | G | T | Not Matched |
| HN003        | PI 089772        | 7193                   | 35.04 | 25.23 | 0.72 | 3.7 | 3 | G | C | G | Matched     |
| HN004        | PI 090763        | 7570                   | 33.53 | 21.93 | 0.65 | 4.1 | 3 | G | C | G | Matched     |
| HN005        | PI 404166        | Krasnoarmejskaja       | 35.53 | 26.84 | 0.76 | 3.1 | 3 | G | C | G | Matched     |
| HN006        | PI 407788A       | SG1P                   | 30.37 | 17.14 | 0.56 | 3.7 | 3 | G | C | G | Matched     |
| HN007        | PI 424298        | KAS 300-10             | 27.27 | 19.85 | 0.73 | 3.5 | 3 | G | C | G | Matched     |
| HN014        | PI 548667        | Essex                  | 42.10 | 29.20 | 0.69 | 2.9 | 3 | G | C | G | Matched     |
| HN016        | PI 567387        | Huang huai dou         | 34.11 | 29.52 | 0.87 | 3.1 | 3 | C | G | T | Not Matched |
| HN017        | PI 437725        | Te-zu-gan              | 35.84 | 30.85 | 0.86 | 3.2 | 3 | C | G | T | Not Matched |
| HN018        | PI 437690        | Pin-din-guan           | 29.36 | 27.47 | 0.94 | 3.1 | 3 | C | G | T | Not Matched |
| HN020        | PI 088788        | 5913                   | 32.73 | 28.53 | 0.87 | 3.0 | 3 | C | G | T | Not Matched |
| HN022        | PI 404198B       | Sun huan do            | 30.13 | 29.01 | 0.96 | 3.1 | 3 | C | G | T | Not Matched |
| HN023        | PI 424608A       | Sun huan do            | 32.03 | 27.11 | 0.85 | 3.9 | 3 | G | C | G | Matched     |
| HN030        | PI 639740        | Maverick               | 37.23 | 20.16 | 0.54 | 4.1 | 3 | G | C | G | Matched     |
| HN031        | PI 079691-4      | No name                | 24.81 | 20.11 | 0.81 | 4.0 | 3 | G | C | G | Matched     |
| HN032        | PI 086006        | Kiio Shokuzu           | 30.39 | 21.42 | 0.70 | 3.9 | 3 | G | C | G | Matched     |
| HN035        | PI 196175        | Yu tae                 | 35.54 | 18.52 | 0.52 | 4.0 | 3 | G | C | G | Matched     |
| HN036        | PI 200471        | Hanayome Ibaragi No. 1 | 38.68 | 25.53 | 0.66 | 4.1 | 3 | G | C | G | Matched     |
| HN037        | PI 200508        | Natsu Daizu            | 35.23 | 22.21 | 0.63 | 4.3 | 3 | G | C | G | Matched     |
| HN038        | PI 248515        |                        | 35.23 | 21.19 | 0.60 | 3.4 | 3 | G | C | G | Matched     |
| HN041        | PI 398593        | KAS 390-4              | 31.83 | 23.89 | 0.75 | 4.0 | 3 | G | C | G | Matched     |
| HN042        | PI 398595        | KAS 390-5              | 36.47 | 21.88 | 0.60 | 3.8 | 3 | G | C | G | Matched     |
| HN043        | PI 398610        | KAS 390-8              | 37.13 | 23.11 | 0.62 | 4.0 | 3 | G | C | G | Matched     |
| HN044        | PI 398614        | KAS 390-9              | 35.71 | 18.69 | 0.52 | 4.0 | 3 | G | C | G | Matched     |
| <u>HN046</u> | <u>PI 407184</u> | K29                    | 36.37 | 26.30 | 0.72 | 3.0 | 3 | G | C | G | Matched     |
| HN050        | PI 416937        | Houjaku Kuwazu         | 34.23 | 25.33 | 0.74 | 3.6 | 3 | G | C | G | Matched     |
| <u>HN052</u> | <u>PI 424079</u> |                        | 34.71 | 24.43 | 0.70 | 3.9 | 3 | G | C | G | Matched     |

|              |                  |                       |       |       |      |     |   |   |   |   |             |
|--------------|------------------|-----------------------|-------|-------|------|-----|---|---|---|---|-------------|
| HN054        | PI 437169B       | VNIISC-4              | 31.63 | 22.03 | 0.70 | 4.0 | 3 | G | C | G | Matched     |
| HN061        | PI 471938        | 0197                  | 38.54 | 26.07 | 0.68 | 4.0 | 3 | G | C | G | Matched     |
| HN062        | PI 475783B       | Tsing 2               | 30.06 | 21.41 | 0.71 | 3.9 | 3 | G | C | G | Matched     |
| HN065        | PI 542044        | Kunitz (L81-4590)     | 37.10 | 23.04 | 0.62 | 4.1 | 3 | G | C | G | Matched     |
| HN066        | PI 547862        | L83-570               | 39.45 | 21.83 | 0.55 | 4.0 | 3 | G | C | G | Matched     |
| HN070        | PI 548511        | Beeson 80             | 36.40 | 22.15 | 0.61 | 3.3 | 3 | G | C | G | Matched     |
| HN072        | PI 549031        | No name               | 34.60 | 24.99 | 0.72 | 3.6 | 3 | G | C | G | Matched     |
| HN073        | PI 552538        | Dunbar                | 39.24 | 25.13 | 0.64 | 3.4 | 3 | G | C | G | Matched     |
| HN081        | PI 567519        | Bai hua chi           | 37.41 | 21.13 | 0.56 | 3.6 | 3 | H | C | H | Matched     |
| HN087        | PI 591539        | L91-8558              | 38.09 | 25.58 | 0.67 | 2.8 | 3 | G | C | G | Matched     |
| HN089        | PI 594012        | Heuksatangdu?         | 32.05 | 25.33 | 0.79 | 3.7 | 3 | G | C | G | Matched     |
| HN091        | PI 594599        | Chang de chun hei dou | 40.09 | 23.95 | 0.60 | 4.0 | 3 | G | C | G | Matched     |
| HN092        | PI 597387        | Pana                  | 33.01 | 25.93 | 0.79 | 3.9 | 3 | G | C | G | Matched     |
| HN094        | PI 603170        | GL 2683 /96           | 31.41 | 23.44 | 0.75 | 3.6 | 3 | G | C | G | Matched     |
| HN095        | PI 603175        | GL 2688 /96           | 26.81 | 24.87 | 0.93 | 3.2 | 3 | G | C | G | Matched     |
| HN096        | PI 603176A       | No name               | 35.06 | 24.52 | 0.70 | 3.8 | 3 | G | C | G | Matched     |
| HN098        | PI 605869A       | Sample 140            | 36.59 | 21.32 | 0.58 | 4.0 | 3 | G | C | G | Matched     |
| HN099        | PI 639740        | LD00-3309             | 37.42 | 24.89 | 0.67 | 3.2 | 3 | G | C | G | Matched     |
| HN100        | PI 647086        | N8001                 | 38.63 | 23.49 | 0.61 | 3.6 | 3 | G | C | G | Matched     |
| HN102        |                  | S07-5049              | 35.23 | 19.04 | 0.54 | 4.0 | 3 | G | C | G | Matched     |
| HN103        | V71-370          | No name               | 33.42 | 23.33 | 0.70 | 4.0 | 3 | G | C | G | Matched     |
| HN106        | PI 417091        | Kuro mame             | 30.23 | 28.78 | 0.95 | 3.7 | 3 | C | G | T | Not Matched |
| <b>HN001</b> | PI 518664        | Hutcheson             | 39.26 | 19.61 | 0.50 | 4.6 | 4 | G | C | G | Matched     |
| HN011        | PI 507354        | Tokei 421             | 39.77 | 13.47 | 0.34 | 5.0 | 4 | G | C | G | Matched     |
| HN012        | PI 567305        | Hei dou zi            | 33.44 | 18.38 | 0.55 | 5.0 | 4 | G | C | G | Matched     |
| HN026        | PI 612611        | Browngilgun           | 36.24 | 19.93 | 0.55 | 5.0 | 4 | G | C | G | Matched     |
| HN029        |                  | IA3023                | 39.27 | 18.40 | 0.47 | 4.4 | 4 | G | C | G | Matched     |
| HN033        | PI 087617        | Miyongaikon           | 40.03 | 19.04 | 0.48 | 4.8 | 4 | G | C | G | Matched     |
| <u>HN045</u> | <u>PI 407162</u> | K1-D                  | 32.69 | 19.96 | 0.61 | 4.4 | 4 | G | C | G | Matched     |
| HN048        | PI 407965        | KAERI 504-4           | 39.14 | 21.54 | 0.55 | 4.6 | 4 | G | C | G | Matched     |
| HN049        | PI 408105A       | KAS 633-19            | 39.14 | 20.19 | 0.52 | 4.8 | 4 | G | C | G | Matched     |
| HN051        | PI 424078        | 74077                 | 35.43 | 17.47 | 0.49 | 5.0 | 4 | G | C | G | Matched     |
| <u>HN053</u> | <u>PI 424088</u> |                       | 36.17 | 15.05 | 0.42 | 5.0 | 4 | G | C | G | Matched     |
| HN057        | PI 438258        | VIR 4714              | 35.84 | 24.54 | 0.68 | 4.4 | 4 | G | C | G | Matched     |
| HN064        | PI 518751        | NS-20                 | 37.54 | 26.01 | 0.69 | 4.4 | 4 | G | C | G | Matched     |
| HN068        | PI 548349        | Ilsoy                 | 34.50 | 19.49 | 0.56 | 4.9 | 4 | G | C | G | Matched     |

|           |           |                       |       |       |      |      |   |   |   |   |         |
|-----------|-----------|-----------------------|-------|-------|------|------|---|---|---|---|---------|
| HN071     | PI 548657 | Jackson               | 40.61 | 17.04 | 0.42 | 5.0  | 4 | G | C | G | Matched |
| HN078     | PI 567354 | You huang dou         | 29.34 | 19.69 | 0.67 | 4.5  | 4 | G | C | G | Matched |
| HN083     | PI 567651 | Shang cai er cao ping | 33.15 | 24.65 | 0.74 | 4.5  | 4 | G | C | G | Matched |
| HN097     | PI 603497 | ding shi              | 29.70 | 17.73 | 0.60 | 4.7  | 4 | G | C | G | Matched |
| HN104     | FC 31721  | Hua dou               | 35.81 | 18.20 | 0.51 | 5.0  | 4 | G | C | G | Matched |
| HN107     | PI 417015 | No name               | 37.02 | 22.28 | 0.60 | 4.6  | 4 | G | C | G | Matched |
| Reference | PI 518671 | Kawanagare (Iwate)    | 35.84 | 24.54 | 0.68 | 4.30 | - | G | C | G | Matched |
|           |           | Williams 82           |       |       |      |      |   |   |   |   |         |

Note: \* Highlighted sequence id represents lines with known salinity reaction. Accession with underline represents wild soybean lines.

"H" represents heterozygote.

# Cluster 1: Tolerant; 2: Moderately tolerant; 3: Moderately sensitive; 4: Sensitive

^ SPAD-A: chlorophyll concentration 1 d before treatment; SAPD-B: chlorophyll concentration 14 d after treatment; SPAD-Ratio: SPAD-A/SPAD-B.

**(B)**

|                | Chr: SNP<br>position | Allele |       | $-\log_{10}$<br>(P-value) | $r^2$ | MAF  |
|----------------|----------------------|--------|-------|---------------------------|-------|------|
|                |                      | Major  | Minor |                           |       |      |
| LSS<br>(WGRS)  | 3:40632077           | G      | C     | 22.62                     | 0.63  | 0.41 |
|                | 3:40528845           | C      | T     | 21.50                     | 0.61  | 0.40 |
|                | 3:40528865           | C      | T     | 21.50                     | 0.61  | 0.40 |
|                | 3:40493449           | C      | T     | 21.22                     | 0.60  | 0.41 |
|                | 3:40500559           | T      | G     | 21.22                     | 0.60  | 0.41 |
| SPAD<br>(WGRS) | 3:40528845           | C      | T     | 17.32                     | 0.53  | 0.40 |
|                | 3:40528865           | C      | T     | 17.32                     | 0.53  | 0.40 |
|                | 3:40483159           | C      | T     | 17.07                     | 0.52  | 0.39 |
|                | 3:40519933           | T      | C     | 17.07                     | 0.52  | 0.39 |
|                | 3:40534592           | G      | A     | 17.06                     | 0.52  | 0.39 |

MAF minor allele frequency.

**Supplementary Table S2:** Analysis of the *GmCHX1* locus in 93 U. S. ancestral lines<sup>44</sup> using WGRS information<sup>43</sup>. Pedigree information of improved cultivars were assessed using GRIN and Soybase databases. Parental lines with ‘red text’ represents sensitive and ‘green text’ represents tolerant genotype.

| Seq # | Seq ID   | Type                     | Accession  | Geographic region  | Variety Name | Cluster* | Pedigree related information                                                                                                                                                    |
|-------|----------|--------------------------|------------|--------------------|--------------|----------|---------------------------------------------------------------------------------------------------------------------------------------------------------------------------------|
| 1     | IGDB-053 | <i>G. soja</i>           | PI407170   | Kyonggi, Korea     |              | SV-3 (S) |                                                                                                                                                                                 |
| 2     | IGDB-044 | <i>G. soja</i>           | PI447004   | Jilin, China       |              |          |                                                                                                                                                                                 |
| 3     | IGDB-105 | <i>Landrace</i>          | PI594788   | Yunnan, China      |              |          |                                                                                                                                                                                 |
| 4     | IGDB-125 | <i>Landrace</i>          | PI567293   | Gansu, China       |              |          |                                                                                                                                                                                 |
| 5     | IGDB-118 | <i>Landrace</i>          | PI587552   | Jiangsu, China     |              |          |                                                                                                                                                                                 |
| 6     | HN031    | <i>Landrace</i>          | PI079691-4 | China              |              |          |                                                                                                                                                                                 |
| 7     | HN006    | <i>Landrace</i>          | PI407788A  | South Korea        |              |          |                                                                                                                                                                                 |
| 8     | HN001    | <i>Improved cultivar</i> | PI518664   | USA                | Hutcheson    |          | V68-1034 x <b>Essex</b>                                                                                                                                                         |
| 9     | HN007    | <i>Landrace</i>          | PI424298   | South Korea        |              |          |                                                                                                                                                                                 |
| 10    | HN071    | <i>Improved Cultivar</i> | PI548657   | NorthCarolina, USA | Jackson      |          | Volstate(2) x <b>Palmetto</b> , Volstate is from <b>Tokyo</b> x PI54610, <b>Palmetto</b> is from chinese land race with salt susceptble by GRIN. Tokyo is land race from Japan. |
| 11    | HN073    | <i>Improved Cutilvar</i> | PI552538   | USA                | Dunbar       |          | Platte X Asgrow A3127 ( <b>Williams X Essex</b> )                                                                                                                               |
| 12    | HN032    | <i>Landrace</i>          | PI086006   | Japan              |              |          |                                                                                                                                                                                 |
| 13    | HN045    | <i>G. soja</i>           | PI407162   | South Korea        |              |          |                                                                                                                                                                                 |
| 14    | IGDB-109 | <i>Landrace</i>          | PI594579   | Hunan, China       |              |          |                                                                                                                                                                                 |
| 15    | IGDB-020 | <i>G. soja</i>           | PI562565   | ChollaPuk, Korea   |              |          |                                                                                                                                                                                 |
| 16    | IGDB-116 | <i>Landrace</i>          | PI587752   | Hubei, China       |              |          |                                                                                                                                                                                 |
| 17    | IGDB-130 | <i>Landrace</i>          | PI548485   | Jiangsu, China     |              |          |                                                                                                                                                                                 |
| 18    | IGDB-108 | <i>Landrace</i>          | PI594615   | Guizhou, China     |              |          |                                                                                                                                                                                 |
| 19    | IGDB-107 | <i>Landrace</i>          | PI594629   | Guizhou, China     |              |          |                                                                                                                                                                                 |
| 20    | IGDB-229 | <i>Improved cultivar</i> | PI548985   | SouthCarolina, USA | Kershaw      |          | <b>Davis</b> x Hale 3                                                                                                                                                           |
| 21    | IGDB-094 | <i>Landrace</i>          |            |                    |              |          |                                                                                                                                                                                 |
| 22    | IGDB-131 | <i>Improved cultivar</i> | PI548477   | Tennessee, USA     | Ogden        |          | <b>Tokyo</b> x PI 54610 PI 54610 is from Changchun, Jilin, China, in 1921                                                                                                       |
| 23    | IGDB-230 | <i>Improved cultivar</i> | PI548657   | NorthCarolina, USA | Jackson      |          | Volstate(2) x <b>Palmetto</b> , Volstate is from <b>Tokyo</b> x PI54610, <b>Palmetto</b> is from chinese land race with salt susceptble by GRIN. Tokyo is land race from Japan. |

|    |          |                          |           |                     |                 |
|----|----------|--------------------------|-----------|---------------------|-----------------|
| 24 | IGDB-054 | <i>G. soja</i>           | PI407131  | Kumamoto, Japan     |                 |
| 25 | IGDB-138 | <i>Landrace</i>          | PI548382  | Liaoning, China     |                 |
| 26 | IGDB-162 | <i>Landrace</i>          | PI407849  | ChollaPuk, Korea    |                 |
| 27 | IGDB-122 | <i>Landrace</i>          | PI567395  | Shaanxi, China      |                 |
| 28 | IGDB-166 | <i>Landrace</i>          | PI399043  | Cheju, Korea        |                 |
| 29 | IGDB-021 | <i>G. soja</i>           | PI562559  | ChollaPuk, Korea    |                 |
| 30 | IGDB-137 | <i>Landrace</i>          | PI548391  | Liaoning, China     |                 |
| 31 | IGDB-096 | <i>Landrace</i>          |           |                     |                 |
| 32 | IGDB-158 | <i>Landrace</i>          | PI423954  | Kumamoto, Japan     |                 |
| 33 | IGDB-163 | <i>Landrace</i>          | PI407801  | Kyonggi, Korea      |                 |
| 34 | IGDB-084 | <i>Landrace</i>          |           |                     |                 |
| 35 | IGDB-262 | <i>Improved cultivar</i> | PI518664  | Virginia, USA       | Hutcheson       |
| 36 | IGDB-255 | <i>Improved cultivar</i> | PI542403  | Minnesota, USA      | Dawson          |
| 37 | IGDB-167 | <i>Landrace</i>          | PI398296  | Kyonggi, Korea      |                 |
| 38 | IGDB-126 | <i>Landrace</i>          | PI567258  | Jiangxi, China      |                 |
| 39 | IGDB-156 | <i>Landrace</i>          | PI424391  | ChollaPuk, Korea    |                 |
| 40 | IGDB-102 | <i>Landrace</i>          | PI603336  | Heilongjiang, China |                 |
| 41 | IGDB-117 | <i>Landrace</i>          | PI587666  | Anhui, China        |                 |
| 42 | IGDB-106 | <i>Landrace</i>          | PI594777  | Yunnan, China       |                 |
| 43 | IGDB-097 | <i>Landrace</i>          |           |                     |                 |
| 44 | IGDB-110 | <i>Landrace</i>          | PI594451  | Sichuan, China      |                 |
| 45 | IGDB-056 | <i>G. soja</i>           | PI393551  | Taiwan              |                 |
| 46 | IGDB-114 | <i>Landrace</i>          | PI588053A | Guangdong, China    |                 |
| 47 | IGDB-133 | <i>Landrace</i>          | PI548445  | Jiangsu, China      |                 |
| 48 | IGDB-265 | <i>Improved cultivar</i> | PI508266  | NorthCarolina, USA  | Young           |
| 49 | IGDB-035 | <i>G. soja</i>           | PI468916  | Liaoning, China     |                 |
| 50 | IGDB-048 | <i>G. soja</i>           | PI407288  | Jilin, China        |                 |
| 51 | IGDB-062 | <i>G. soja</i>           | PI326582A | Primorye, Russian   |                 |
| 52 | IGDB-061 | <i>G. soja</i>           | PI339871A | Cheju, Korea        |                 |
| 53 | IGDB-037 | <i>G. soja</i>           | PI464935  | Jiangsu, China      |                 |
| 54 | IGDB-041 | <i>G. soja</i>           | PI458538  | Heilongjiang, China |                 |
| 55 | IGDB-047 | <i>G. soja</i>           | PI407301  | Zhejiang, China     |                 |
| 56 | IGDB-055 | <i>G. soja</i>           | PI407027  | Akita, Japan        | <b>SV-1 (S)</b> |

V68-1034 x **Essex**  
 Evans x M63-217Y, M63-217Y is a yellow hilum NIL of '**Hodgson**'

Davis/**Essex**

|    |           |                          |          |                        |                   |                                                                                                                                                                                  |
|----|-----------|--------------------------|----------|------------------------|-------------------|----------------------------------------------------------------------------------------------------------------------------------------------------------------------------------|
| 57 | IGDB-050  | <i>G. soja</i>           | PI407275 | Kyonggi, Korea         |                   |                                                                                                                                                                                  |
| 58 | IGDB-042  | <i>G. soja</i>           | PI458536 | Heilongjiang, China    |                   |                                                                                                                                                                                  |
| 59 | IGDB-233  | <i>Improved cultivar</i> | PI548638 | Ontario, Canada        | OAC Libra         | FH 31-3 ( <b>Fiskeby V</b> x Harosoy 63) x Evans Fiskeby V is PI 360955 from Sweden. Harosoy ( <b>Mandarin (Ottawa)</b> (2) X A.K. (Harrow))                                     |
| 60 | IGDB-236  | <i>Improved cultivar</i> | PI548604 | Missouri, USA          | Pershing          | D67-3297 [Hill(2) x Kisaya (PI 171450)] x <b>Essex</b>                                                                                                                           |
| 61 | IGDB-242  | <i>Improved cultivar</i> | PI548524 | Iowa, USA              | Weber             | C1453 [C1266R (Harosoy x C1079) x C1253] x Swift C1079 is from C985 (Lincoln x Ogden), a 'Kent' progenitor C1253 is from Blackhawk x Harosoy                                     |
| 62 | IGDB-101  | <i>Landrace</i>          | PI603357 | Jilin, China           |                   |                                                                                                                                                                                  |
| 63 | IGDB-264  | <i>Improved cultivar</i> | PI513382 | Minnesota, USA         | Glenwood          | Evans x Peterson 85 Peterson 85 is from Provar x (Amsoy x PI 248404) PI 248404 is 'Novosadska Bela' from Yugoslavia in 1958                                                      |
| 64 | IGDB-193  | <i>Improved cultivar</i> | FC33243  | Iowa, USA              | Anderson          | A rogue selected from <b>Lincoln</b> by H.J. Anderson, Calamus, Iowa, in 1954                                                                                                    |
| 65 | IGDB-244  | <i>Improved cultivar</i> | PI548512 | Indiana, USA           | Century           | Calland x Bonus                                                                                                                                                                  |
| 66 | HN088     | <i>Improved cultivar</i> | PI593258 | NA                     | Macon             | F4 selection from Sherman x Resnik (Asgrow x <b>Williams82</b> )                                                                                                                 |
| 67 | HN099     | <i>Improved cultivar</i> | PI639740 |                        | LD00-3309         | 'Maverick' x 'Dwight'                                                                                                                                                            |
| 68 | IGDB-237  | <i>Improved cultivar</i> | PI548603 | Indiana, USA           | Perry             | Patoka x L37-1355 (a rogue in PI 81041)                                                                                                                                          |
| 69 | HN014     | <i>Improved cultivar</i> | PI548667 | USA                    | Essex             | Lee x S5-7075 (N48-1248 x Perry) N48-1248 is from Roanoke x N45-745 (Ogden x CNS)                                                                                                |
| 70 | IGDB-135  | <i>Landrace</i>          | PI548406 | Jilin, China           |                   |                                                                                                                                                                                  |
| 71 | HN051     | <i>Landrace</i>          | PI424078 | South Korea            |                   |                                                                                                                                                                                  |
| 72 | HN092     | <i>Improved cultivar</i> | PI597387 | USA                    | Pana              | <b>Jack</b> x Asgrow A3205, Jack (Fayette X Hardin), Fayette ( <b>Williams</b> (2) X PI 88788), Hardin ( <b>Corsoy</b> (3) X Cutler 71)                                          |
| 73 | IGDB-124  | <i>Landrace</i>          | PI567298 | Gansu, China           |                   |                                                                                                                                                                                  |
| 74 | IGDB-140  | <i>Improved cultivar</i> | PI548362 | Illinois, USA          | Lincoln           | <b>Mandarin</b> x Manchu.                                                                                                                                                        |
| 75 | HN103     | <i>Improved cultivar</i> | V71-370  | USA                    |                   |                                                                                                                                                                                  |
| 76 | Ref (W82) | <i>Improved cultivar</i> | PI518671 | USA                    | Williams 82       | Williams(7) x Kingwa                                                                                                                                                             |
| 77 | IGDB-132  | <i>Landrace</i>          | PI548456 | Pyongyang, North Korea |                   |                                                                                                                                                                                  |
| 78 | IGDB-139  | <i>Landrace</i>          | PI548379 | Heilongjiang, China    | Mandarin (Ottawa) | Selected from ' <b>Mandarin</b> ' in 1929                                                                                                                                        |
| 79 | IGDB-232  | <i>Improved cultivar</i> | PI548643 | Ontario, Canada        | Maple Glen        | BD22115-13 [(Amsoy x Portage) x Holmberg 840-7-3] x Premier Holmberg 840-7-3 is from 201-14-20 (PI 196491 sib) x 680+993+994 (Muncheberg) Premier is Pride B216 (Corsoy x Wayne) |
| 80 | IGDB-256  | <i>Improved cultivar</i> | PI540552 | Ohio, USA              | Hoyt              | Harcor x Elf                                                                                                                                                                     |
| 81 | IGDB-263  | <i>Improved cultivar</i> | PI515961 | Kentucky, USA          | Pennyrile         | <b>Williams</b> x <b>Essex</b>                                                                                                                                                   |



|     |          |                          |           |                     |           |                     |                                                                                                                      |
|-----|----------|--------------------------|-----------|---------------------|-----------|---------------------|----------------------------------------------------------------------------------------------------------------------|
| 82  | IGDB-266 | <i>Improved cultivar</i> | PI508083  | Minnesota, USA      | Dassel    |                     | Evans x M66-18 M66-18 is from Clay x Altona                                                                          |
| 83  | IGDB-098 | <i>Landrace</i>          |           |                     |           |                     |                                                                                                                      |
| 84  | IGDB-103 | <i>Landrace</i>          | PI603318  | Heilongjiang, China |           |                     |                                                                                                                      |
| 85  | IGDB-157 | <i>Landrace</i>          | PI423967  | Kumamoto, Japan     |           |                     |                                                                                                                      |
| 86  | HN029    | <i>Improved cultivar</i> |           | USA                 | IA3023    |                     |                                                                                                                      |
| 87  | HN030    | <i>Improved cultivar</i> | PI598124  | USA                 | Maverick  |                     | LN86 4668 x Resnik                                                                                                   |
| 88  | HN101    | <i>Improved cultivar</i> | PI658519  | USA                 | LD00-2817 |                     | Ina x Dwight                                                                                                         |
| 89  | HN102    | <i>Improved cultivar</i> |           | USA                 | S07-5049  |                     |                                                                                                                      |
| 90  | IGDB-015 | <i>G. soja</i>           | PI597459D | Shandong, China     |           |                     |                                                                                                                      |
| 91  | IGDB-060 | <i>G. soja</i>           | PI366120  | Akita, Japan        |           |                     |                                                                                                                      |
| 92  | IGDB-031 | <i>G. soja</i>           | PI483464A | Ningxia, China      |           |                     |                                                                                                                      |
| 93  | IGDB-036 | <i>G. soja</i>           | PI468400A | Ningxia, China      |           |                     |                                                                                                                      |
| 94  | IGDB-121 | <i>Landrace</i>          | PI567503  | Hebei, China        |           |                     |                                                                                                                      |
| 95  | IGDB-099 | <i>Landrace</i>          |           |                     |           |                     |                                                                                                                      |
| 96  | IGDB-022 | <i>G. soja</i>           | PI549046  | Shaanxi, China      |           |                     |                                                                                                                      |
| 97  | IGDB-030 | <i>G. soja</i>           | PI483465  | Shaanxi, China      |           |                     |                                                                                                                      |
| 98  | IGDB-104 | <i>Landrace</i>          | PI602991  | Shandong, China     |           |                     |                                                                                                                      |
| 99  | IGDB-258 | <i>Improved cultivar</i> | PI533655  | Illinois, USA       | Burlison  |                     | K74-113-76-486 x Century K74-113-76-486 is Tracy x Pomona.<br>Centry from Calland x Bonus.                           |
| 100 | IGDB-231 | <i>Improved cultivar</i> | PI548644  | Ontario, Canada     | OAC Musca | <b>SV-2<br/>(T)</b> | McCall x <b>Bicentennial</b> ( <b>Fiskeby V</b> X Harosoy 63)                                                        |
| 101 | IGDB-100 | <i>Landrace</i>          |           |                     |           |                     |                                                                                                                      |
| 102 | IGDB-120 | <i>Landrace</i>          | PI567525  | Shandong, China     |           |                     |                                                                                                                      |
| 103 | IGDB-123 | <i>Landrace</i>          | PI567364  | Ningxia, China      |           |                     |                                                                                                                      |
| 104 | IGDB-014 | <i>G. soja</i>           | PI597461A | Shandong, China     |           |                     |                                                                                                                      |
| 105 | IGDB-129 | <i>Landrace</i>          | PI548488  | Heilongjiang, China |           |                     |                                                                                                                      |
| 106 | IGDB-141 | <i>Landrace</i>          | PI548348  | Northeast, China    |           |                     |                                                                                                                      |
| 107 | IGDB-143 | <i>Improved cultivar</i> | PI548311  | Ontario, Canada     | Capital   |                     | No. 171 x <b>A.K. (Harrow)</b> No. 171 is from Sochentze, Heilongjiang, China, in 1931                               |
| 108 | IGDB-144 | <i>Landrace</i>          | PI548298  | China               |           |                     |                                                                                                                      |
| 109 | IGDB-228 | <i>Improved cultivar</i> | PI553047  | Georgia, USA        | Gordon    |                     | <b>Forrest</b> ( <b>Dyer</b> X <b>Baggs</b> ) X <b>Pickett 71</b> , <b>Dyer</b> [Hill X ( <b>Lee</b> (2) x Peking )] |
| 110 | IGDB-234 | <i>Improved cultivar</i> | PI548634  | Ohio, USA           | Zane      |                     | <b>Cumberland</b> x Pella                                                                                            |
| 111 | IGDB-257 | <i>Improved cultivar</i> | PI536635  | Ohio, USA           | Sprite    |                     | Williams x <b>Ransom</b>                                                                                             |

|     |          |                          |          |               |                |                                                                                                                                                         |
|-----|----------|--------------------------|----------|---------------|----------------|---------------------------------------------------------------------------------------------------------------------------------------------------------|
| 112 | IGDB-259 | <i>Improved cultivar</i> | PI533602 | Arkansas, USA | Lloyd          | Selection from <b>Centennial</b> x R75-12L R75-12L is from R72-2647(3) x (D68-18 x PI 88788) R72-2647 is similar to <b>Lee</b> 74 D68-18 is Forrest sib |
| 113 | HN084    | <i>Landrace</i>          | PI567690 | China         |                |                                                                                                                                                         |
| 114 | HN105    | <i>Improved cultivar</i> | PI438471 | Sweden        | Fiskeby III    |                                                                                                                                                         |
| 115 | HN028    |                          | PI572239 | USA           | Holladay S-100 |                                                                                                                                                         |
| 116 | HN013    | <i>Improved cultivar</i> |          | USA           | S05-11482      |                                                                                                                                                         |
| 117 | HN082    | <i>Landrace</i>          | PI567611 | China         |                |                                                                                                                                                         |
| 118 | HN063    | <i>G. soja</i>           | PI483463 | China         |                |                                                                                                                                                         |
| 119 | HN106    | <i>Landrace</i>          | PI417091 | Japan         |                |                                                                                                                                                         |

Note: The 93 U.S. ancestral lines ("IGDB") were assigned to structural variant groups after comparison with 106 lines ("HN") used in this study.

**Supplementary Table S3** Identification of informative SNPs associated with three different structural variants as shown in Fig. 4. SNP position from start codon.

| Seq id    | Cluster  |      |      | M1  | M2 |      |      |      |      |      |      |      |      |      |      | M3    | M4    | M5 | M6 |
|-----------|----------|------|------|-----|----|------|------|------|------|------|------|------|------|------|------|-------|-------|----|----|
|           |          | -869 | -100 | -20 | 38 | 1295 | 1466 | 1624 | 1775 | 1809 | 2180 | 2642 | 4101 | 8961 | 9011 | 10705 | 11409 |    |    |
| W82 (Ref) | SV-1 (S) | T    | C    | G   | A  | T    | C    | G    | G    | C    | G    | T    | G    | T    | C    | T     | G     |    |    |
| HN051     |          | T    | C    | G   | A  | T    | C    | G    | G    | C    | G    | T    | G    | T    | C    | T     | G     |    |    |
| HN011     |          | T    | C    | G   | A  | T    | C    | G    | G    | C    | G    | T    | G    | T    | C    | T     | G     |    |    |
| HN014     |          | T    | C    | G   | A  | T    | C    | G    | G    | C    | G    | T    | G    | T    | C    | T     | G     |    |    |
| HN089     |          | T    | C    | G   | A  | T    | C    | G    | G    | C    | G    | T    | G    | T    | C    | T     | G     |    |    |
| HN029     |          | T    | C    | G   | A  | T    | C    | G    | G    | C    | G    | T    | G    | T    | C    | T     | G     |    |    |
| HN049     |          | T    | C    | G   | A  | T    | C    | G    | G    | C    | G    | T    | G    | T    | C    | T     | G     |    |    |
| HN042     |          | T    | C    | G   | A  | T    | C    | G    | G    | C    | G    | T    | G    | T    | C    | T     | G     |    |    |
| HN051     |          | T    | C    | G   | A  | T    | C    | G    | G    | C    | G    | T    | G    | T    | C    | T     | G     |    |    |
| HN062     |          | T    | C    | G   | A  | T    | C    | G    | G    | C    | G    | T    | G    | T    | C    | T     | G     |    |    |
| HN066     |          | T    | C    | G   | A  | T    | C    | G    | G    | C    | G    | T    | G    | T    | C    | T     | G     |    |    |
| HN087     |          | T    | C    | G   | A  | T    | C    | G    | G    | C    | G    | T    | G    | T    | C    | T     | G     |    |    |
| HN092     |          | T    | C    | G   | A  | T    | C    | G    | G    | C    | G    | T    | H    | T    | S    | T     | G     |    |    |
| HN099     |          | T    | C    | G   | A  | T    | C    | G    | G    | C    | G    | T    | G    | T    | C    | T     | G     |    |    |
| HN081     |          | T    | H    | S   | A  | Y    | Y    | R    | G    | -    | H    | G    | H    | T    | S    | T     | H     |    |    |
| HN101     |          | T    | C    | G   | A  | T    | C    | G    | G    | C    | G    | T    | G    | T    | C    | T     | G     |    |    |
| HN054     |          | T    | C    | G   | A  | T    | C    | G    | G    | C    | G    | T    | G    | T    | C    | T     | G     |    |    |
| HN103     |          | T    | C    | G   | A  | T    | C    | G    | G    | C    | G    | T    | G    | T    | C    | T     | G     |    |    |
| HN102     |          | T    | C    | G   | A  | T    | C    | G    | G    | C    | G    | T    | G    | T    | C    | T     | G     |    |    |
| HN088     |          | T    | C    | G   | A  | T    | C    | G    | G    | C    | G    | T    | G    | T    | C    | T     | G     |    |    |
| HN093     |          | T    | C    | G   | A  | T    | C    | G    | G    | C    | G    | T    | G    | T    | C    | T     | G     |    |    |
| HN065     |          | T    | C    | G   | A  | T    | C    | G    | G    | C    | G    | T    | G    | T    | C    | T     | G     |    |    |
| HN030     |          | T    | C    | G   | A  | T    | C    | G    | G    | C    | G    | T    | G    | T    | C    | T     | G     |    |    |
| HN022     |          | A    | A    | C   | A  | C    | T    | A    | A    | T    | A    | T    | A    | T    | G    | A     | T     |    |    |
| HN039     |          | H    | C    | G   | A  | H    | C    | G    | G    | C    | G    | T    | R    | T    | C    | H     | G     |    |    |
| HN040     |          | A    | C    | G   | A  | C    | C    | G    | G    | C    | G    | G    | A    | T    | G    | A     | G     |    |    |
| HN002     |          | A    | A    | C   | A  | C    | T    | A    | A    | T    | A    | G    | A    | T    | G    | A     | T     |    |    |
| HN008     |          | A    | A    | C   | A  | C    | T    | A    | A    | T    | A    | G    | A    | T    | G    | A     | T     |    |    |
| HN009     | A        | A    | C    | A   | C  | T    | A    | A    | T    | A    | G    | A    | T    | G    | A    | T     |       |    |    |
| HN010     | A        | A    | C    | A   | C  | T    | A    | A    | T    | A    | G    | A    | T    | G    | A    | T     |       |    |    |

|       |          |   |   |   |   |   |   |   |   |   |   |   |   |   |   |   |   |
|-------|----------|---|---|---|---|---|---|---|---|---|---|---|---|---|---|---|---|
| HN013 | A        | A | C | A | C | T | A | A | T | A | G | A | T | G | A | T |   |
| HN015 | A        | A | C | A | C | T | A | A | T | A | G | A | T | G | A | T |   |
| HN018 | A        | A | C | A | C | T | A | A | T | A | G | A | T | G | A | T |   |
| HN020 | A        | A | C | A | C | T | A | G | C | A | G | A | T | G | A | T |   |
| HN021 | A        | A | C | A | C | T | A | A | T | A | G | A | T | G | A | T |   |
| HN024 | A        | A | C | A | C | T | A | A | T | A | G | A | T | G | A | T |   |
| HN025 | A        | A | C | A | C | T | A | G | T | A | G | A | T | G | A | T |   |
| HN027 | T        | A | C | A | C | T | A | - | C | A | T | A | T | G | A | T |   |
| HN028 | A        | A | C | A | C | T | A | A | T | A | G | A | T | G | A | T |   |
| HN034 | A        | A | C | A | C | T | A | A | T | A | G | A | T | G | A | T |   |
| HN047 | A        | A | C | A | C | T | A | A | T | A | G | A | T | G | A | T |   |
| HN055 | A        | A | C | A | C | T | A | A | T | A | G | A | T | G | A | T |   |
| HN056 | A        | A | C | A | C | T | A | A | T | A | G | A | T | G | A | T |   |
| HN059 | A        | A | C | A | C | T | A | A | T | A | G | A | T | G | A | T |   |
| HN060 | A        | A | C | A | C | T | A | A | T | A | G | A | T | G | A | T |   |
| HN063 | A        | A | C | A | C | T | A | A | T | A | G | A | T | G | A | T |   |
| HN069 | A        | A | C | A | C | T | A | A | T | A | G | A | T | G | A | T |   |
| HN074 | A        | A | C | A | C | T | A | A | T | A | G | A | T | G | A | T |   |
| HN075 | A        | A | C | A | C | T | A | A | T | A | G | A | T | G | A | T |   |
| HN076 | A        | A | C | A | C | T | A | A | T | A | G | A | T | G | A | T |   |
| HN077 | A        | A | C | A | C | T | A | A | T | A | G | A | T | G | A | T |   |
| HN079 | A        | A | C | A | C | T | A | A | T | A | G | A | T | G | A | T |   |
| HN080 | A        | A | C | A | C | T | A | A | T | A | G | A | T | G | A | T |   |
| HN082 | A        | A | C | A | C | T | A | A | T | A | G | A | T | G | A | T |   |
| HN084 | A        | A | C | A | C | T | A | A | T | A | T | A | T | G | A | T |   |
| HN085 | A        | A | C | A | C | T | A | A | T | A | G | A | T | G | A | T |   |
| HN086 | A        | A | C | A | C | T | A | A | - | A | G | A | T | G | A | T |   |
| HN016 | A        | A | C | A | C | T | A | A | T | A | G | A | T | G | A | T |   |
| HN067 | A        | A | C | A | C | T | A | A | T | A | G | A | T | G | A | T |   |
| HN090 | A        | A | C | A | C | T | A | A | T | A | G | A | T | G | A | T |   |
| HN105 | A        | A | C | A | C | T | A | A | T | A | G | A | T | G | A | T |   |
| HN106 | A        | A | C | A | C | T | A | A | T | A | G | A | T | G | A | T |   |
| HN057 | T        | C | G | H | T | C | G | G | C | G | T | G | H | C | T | G |   |
| HN038 | SV-3 (S) | T | C | G | T | - | C | G | G | C | G | T | - | C | C | A | G |
| HN001 |          | T | C | G | T | - | - | - | G | C | G | T | - | C | C | A | G |

|       |   |   |   |   |   |   |   |   |   |   |   |   |   |   |   |   |
|-------|---|---|---|---|---|---|---|---|---|---|---|---|---|---|---|---|
| HN006 | T | C | G | T | - | C | - | G | C | G | T | - | C | C | A | G |
| HN007 | T | C | G | T | - | - | G | G | C | G | T | - | C | C | A | G |
| HN012 | T | C | G | T | - | - | - | G | C | G | T | - | C | C | A | G |
| HN023 | T | C | G | T | - | - | G | G | C | G | T | - | C | C | A | G |
| HN026 | T | C | G | T | - | - | G | G | C | G | T | - | C | C | A | G |
| HN031 | T | C | G | T | - | - | - | G | C | G | T | - | C | C | A | G |
| HN032 | T | C | G | T | - | - | G | G | C | G | T | - | C | C | A | G |
| HN033 | T | C | G | T | - | - | G | G | C | G | T | - | C | C | A | G |
| HN035 | T | C | G | T | - | - | G | G | C | G | T | - | C | C | A | G |
| HN041 | T | C | G | T | - | - | G | G | C | G | T | - | C | C | A | G |
| HN043 | T | C | G | T | - | C | G | G | C | G | T | - | C | C | A | G |
| HN044 | T | C | G | T | - | - | G | G | C | G | T | - | C | C | A | G |
| HN045 | T | C | G | T | - | - | G | G | C | G | T | - | C | C | A | G |
| HN046 | T | C | G | T | - | - | G | G | C | G | T | - | C | C | A | G |
| HN048 | T | C | G | T | - | - | G | G | C | G | T | - | C | C | A | G |
| HN052 | T | C | G | T | - | - | G | G | C | G | T | - | C | C | A | G |
| HN053 | T | C | G | T | - | - | G | G | C | G | T | - | C | C | A | G |
| HN058 | T | H | H | A | C | T | A | H | H | H | H | A | H | S | A | H |
| HN061 | T | C | G | T | - | - | G | G | C | G | T | - | C | C | A | G |
| HN064 | T | C | G | T | - | C | G | G | C | G | T | - | C | C | A | G |
| HN068 | T | C | G | T | - | C | G | G | C | G | T | - | C | C | A | G |
| HN070 | T | C | G | T | - | - | - | G | C | G | T | - | C | C | A | G |
| HN071 | T | C | G | T | - | - | G | G | C | G | T | - | C | C | A | G |
| HN073 | T | C | G | A | - | T | G | G | C | G | T | - | C | C | A | G |
| HN100 | T | C | G | T | - | - | G | G | C | G | T | - | C | C | A | G |
| HN083 | T | C | G | T | - | - | G | G | C | G | T | - | C | C | A | G |
| HN091 | T | C | G | T | - | - | G | G | C | G | T | - | C | C | A | G |
| HN094 | T | C | G | T | - | C | G | G | C | G | T | - | C | C | A | G |
| HN096 | T | C | G | T | - | - | G | G | C | G | T | - | C | C | A | G |
| HN097 | T | C | G | T | - | C | G | G | C | G | T | - | C | C | T | G |
| HN036 | T | C | G | T | - | - | - | G | C | - | T | - | C | C | A | G |
| HN098 | T | C | G | T | - | C | G | G | C | G | T | - | C | C | A | G |
| HN050 | T | C | G | T | - | C | G | G | C | G | T | - | C | C | A | G |
| HN095 | T | C | G | T | - | - | G | G | C | G | T | - | C | C | A | G |

|       |   |   |   |   |   |   |   |   |   |   |   |   |   |   |   |   |
|-------|---|---|---|---|---|---|---|---|---|---|---|---|---|---|---|---|
| HN104 | T | C | G | T | - | C | G | G | C | G | T | - | C | C | A | G |
| HN107 | T | C | G | T | - | - | - | G | C | G | T | - | C | C | A | G |
| HN037 | T | C | G | T | - | C | G | G | C | G | T | - | C | C | A | G |
| HN108 | T | C | G | T | - | C | G | G | C | G | T | - | C | C | A | G |
| HN078 | T | C | G | T | - | - | G | G | C | G | T | - | C | C | A | G |

Note : SNPs denoted as M1-M6 were used to develop KASPar assay. The marker M1, M4 and M6 (highlighted with red text) are associated with tolerant and sensitive group. "H" represents heterozygote.

**Supplementary Table S4:** Validation of six KASPar assay using 104 resequencing lines and correlation between genotype and phenotype data.

| Seq Id       | SV   | M1* | Genotype vs Phenotype | M2 | Genotype vs SV | M3 | Genotype vs SV | M4* | Genotype vs Phenotype | M5 | Genotype vs SV | M6* | Genotype vs Phenotype |
|--------------|------|-----|-----------------------|----|----------------|----|----------------|-----|-----------------------|----|----------------|-----|-----------------------|
| HN011        | SV-1 | G   | Matched               | A  | Matched        | T  | Matched        | C   | Matched               | T  | Matched        | G   | Matched               |
| HN014        | SV-1 | G   | Matched               | A  | Matched        | T  | Matched        | C   | Matched               | T  | Matched        | G   | Matched               |
| HN029        | SV-1 | G   | Matched               | A  | Matched        | T  | Matched        | C   | Matched               | T  | Matched        | G   | Matched               |
| HN030        | SV-1 | G   | Matched               | A  | Matched        | T  | Matched        | C   | Matched               | T  | Matched        | G   | Matched               |
| <u>HN039</u> | SV-1 | G   | Not Matched           | A  | Matched        | T  | Matched        | C   | Not Matched           | H  | Matched        | G   | Not Matched           |
| HN042        | SV-1 | G   | Matched               | A  | Matched        | T  | Matched        | C   | Matched               | T  | Matched        | G   | Matched               |
| HN049        | SV-1 | G   | Matched               | A  | Matched        | T  | Matched        | C   | Matched               | T  | Matched        | G   | Matched               |
| HN051        | SV-1 | G   | Matched               | A  | Matched        | T  | Matched        | C   | Matched               | T  | Matched        | G   | Matched               |
| HN054        | SV-1 | G   | Matched               | A  | Matched        | T  | Matched        | C   | Matched               | T  | Matched        | G   | Matched               |
| HN057        | SV-1 | G   | Matched               | H  | Matched        | H  | Matched        | H   | Matched               | H  | Matched        | G   | Matched               |
| HN058        | SV-1 | H   | Matched               | H  | Matched        | Y  | Matched        | H   | Matched               | A  | Not Matched    | T   | Matched               |
| HN062        | SV-1 | G   | Matched               | A  | Matched        | T  | Matched        | C   | Matched               | T  | Matched        | G   | Matched               |
| HN065        | SV-1 | G   | Matched               | A  | Matched        | T  | Matched        | C   | Matched               | T  | Matched        | G   | Matched               |
| HN066        | SV-1 | G   | Matched               | A  | Matched        | T  | Matched        | C   | Matched               | T  | Matched        | G   | Matched               |
| HN081        | SV-1 | H   | Matched               | A  | Matched        | T  | Matched        | C   | Matched               | T  | Matched        | H   | Matched               |
| HN088        | SV-1 | G   | Not Matched           | A  | Matched        | T  | Matched        | C   | Not Matched           | T  | Matched        | G   | Not Matched           |
| HN089        | SV-1 | G   | Matched               | A  | Matched        | T  | Matched        | C   | Matched               | T  | Matched        | G   | Matched               |
| HN092        | SV-1 | G   | Matched               | A  | Matched        | T  | Matched        | C   | Matched               | T  | Matched        | G   | Matched               |
| HN099        | SV-1 | G   | Matched               | A  | Matched        | T  | Matched        | C   | Matched               | T  | Matched        | G   | Matched               |
| HN101        | SV-1 | G   | Not Matched           | A  | Matched        | T  | Matched        | C   | Not Matched           | T  | Matched        | G   | Not Matched           |
| HN102        | SV-1 | G   | Matched               | A  | Matched        | T  | Matched        | C   | Matched               | T  | Matched        | G   | Matched               |
| HN103        | SV-1 | G   | Matched               | A  | Matched        | T  | Matched        | C   | Matched               | T  | Matched        | G   | Matched               |
| HN008        | SV-2 | C   | Matched               | A  | Matched        | T  | Matched        | G   | Matched               | A  | Matched        | T   | Matched               |
| HN009        | SV-2 | C   | Matched               | A  | Matched        | T  | Matched        | G   | Matched               | A  | Matched        | T   | Matched               |
| HN010        | SV-2 | C   | Matched               | A  | Matched        | T  | Matched        | G   | Matched               | A  | Matched        | T   | Matched               |
| HN013        | SV-2 | C   | Matched               | A  | Matched        | T  | Matched        | G   | Matched               | A  | Matched        | T   | Matched               |
| HN015        | SV-2 | C   | Matched               | A  | Matched        | T  | Matched        | G   | Matched               | A  | Matched        | T   | Matched               |
| HN016        | SV-2 | C   | Not Matched           | A  | Matched        | T  | Matched        | G   | Not Matched           | A  | Matched        | T   | Not Matched           |
| HN017        | SV-2 | C   | Not Matched           | A  | Matched        | T  | Matched        | G   | Not Matched           | A  | Matched        | T   | Not Matched           |
| HN018        | SV-2 | C   | Not Matched           | A  | Matched        | T  | Matched        | G   | Not Matched           | A  | Matched        | T   | Not Matched           |
| HN020        | SV-2 | C   | Not Matched           | A  | Matched        | T  | Matched        | G   | Not Matched           | A  | Matched        | T   | Not Matched           |

|              |      |   |             |   |             |   |         |   |             |   |             |   |             |
|--------------|------|---|-------------|---|-------------|---|---------|---|-------------|---|-------------|---|-------------|
| HN021        | SV-2 | C | Matched     | A | Matched     | T | Matched | G | Matched     | A | Matched     | T | Matched     |
| HN022        | SV-2 | C | Not Matched | A | Matched     | T | Matched | G | Not Matched | A | Not Matched | T | Not Matched |
| HN024        | SV-2 | C | Matched     | A | Matched     | T | Matched | G | Matched     | A | Matched     | T | Matched     |
| HN025        | SV-2 | C | Matched     | A | Matched     | T | Matched | G | Matched     | A | Matched     | T | Matched     |
| HN027        | SV-2 | C | Matched     | A | Matched     | T | Matched | G | Matched     | A | Matched     | T | Matched     |
| <b>HN028</b> | SV-2 | C | Matched     | A | Matched     | T | Matched | G | Matched     | A | Matched     | T | Matched     |
| <u>HN040</u> | SV-2 | G | Not Matched | A | Matched     | T | Matched | G | Matched     | A | Matched     | G | Not Matched |
| HN047        | SV-2 | C | Matched     | A | Matched     | T | Matched | G | Matched     | A | Matched     | T | Matched     |
| HN055        | SV-2 | C | Matched     | A | Matched     | T | Matched | G | Matched     | A | Matched     | T | Matched     |
| HN056        | SV-2 | C | Matched     | A | Matched     | T | Matched | G | Matched     | A | Matched     | T | Matched     |
| HN060        | SV-2 | C | Matched     | A | Matched     | T | Matched | G | Matched     | A | Matched     | T | Matched     |
| <b>HN063</b> | SV-2 | C | Matched     | A | Matched     | T | Matched | G | Matched     | A | Matched     | T | Matched     |
| HN067        | SV-2 | C | Matched     | A | Matched     | T | Matched | G | Matched     | A | Matched     | T | Matched     |
| HN069        | SV-2 | C | Matched     | A | Matched     | T | Matched | G | Matched     | A | Matched     | T | Matched     |
| HN074        | SV-2 | C | Matched     | A | Matched     | T | Matched | G | Matched     | A | Matched     | T | Matched     |
| HN075        | SV-2 | C | Matched     | A | Matched     | T | Matched | G | Matched     | A | Matched     | T | Matched     |
| HN076        | SV-2 | C | Matched     | A | Matched     | T | Matched | G | Matched     | A | Matched     | T | Matched     |
| HN077        | SV-2 | C | Matched     | A | Matched     | T | Matched | G | Matched     | A | Matched     | T | Matched     |
| HN079        | SV-2 | C | Matched     | A | Matched     | T | Matched | G | Matched     | A | Matched     | T | Matched     |
| HN080        | SV-2 | C | Matched     | A | Matched     | T | Matched | G | Matched     | A | Matched     | T | Matched     |
| HN082        | SV-2 | C | Matched     | A | Matched     | T | Matched | G | Matched     | A | Matched     | T | Matched     |
| HN084        | SV-2 | C | Matched     | A | Matched     | T | Matched | G | Matched     | A | Matched     | T | Matched     |
| HN085        | SV-2 | C | Matched     | A | Matched     | T | Matched | G | Matched     | A | Matched     | T | Matched     |
| HN086        | SV-2 | C | Matched     | A | Matched     | T | Matched | G | Matched     | A | Matched     | T | Matched     |
| HN087        | SV-2 | G | Matched     | A | Matched     | T | Matched | C | Matched     | T | Not Matched | G | Matched     |
| HN090        | SV-2 | C | Matched     | A | Matched     | T | Matched | G | Matched     | A | Matched     | T | Matched     |
| <b>HN105</b> | SV-2 | C | Matched     | A | Matched     | T | Matched | G | Matched     | A | Matched     | T | Matched     |
| HN106        | SV-2 | C | Not Matched | A | Matched     | T | Matched | G | Not Matched | A | Matched     | T | Not Matched |
| HN002        | SV-2 | C | Not Matched | A | Matched     | T | Matched | G | Not Matched | A | Matched     | T | Not Matched |
| HN003        | SV-2 | G | Matched     | A | Matched     | T | Matched | C | Matched     | A | Matched     | G | Matched     |
| HN004        | SV-2 | G | Matched     | A | Matched     | T | Matched | C | Matched     | A | Matched     | G | Matched     |
| HN005        | SV-2 | G | Matched     | A | Matched     | T | Matched | C | Matched     | A | Matched     | G | Matched     |
| HN072        | SV-2 | G | Matched     | T | Not Matched | T | Matched | C | Matched     | A | Matched     | G | Matched     |
| HN006        | SV-3 | G | Matched     | T | Matched     | C | Matched | C | Matched     | A | Matched     | G | Matched     |
| HN007        | SV-3 | G | Matched     | T | Matched     | C | Matched | C | Matched     | A | Matched     | G | Matched     |
| HN012        | SV-3 | G | Matched     | T | Matched     | C | Matched | C | Matched     | A | Matched     | G | Matched     |





|           |      |   |         |   |         |   |         |   |         |   |         |   |         |
|-----------|------|---|---------|---|---------|---|---------|---|---------|---|---------|---|---------|
| Reference | SV-1 | G | Matched | A | Matched | T | Matched | C | Matched | A | Matched | G | Matched |
|-----------|------|---|---------|---|---------|---|---------|---|---------|---|---------|---|---------|

Note: \* denotes these marker can differentiate salt-tolerant and salt-sensitive lines. Highlighted sequence id represents lines with known salinity reaction. Accession with underline represents wild soybean lines. "H" represents heterozygote.

**Supplementary Table S5.** Genotypic evaluation of F<sub>8</sub> RIL population derived from (PI 483463 x Hutcheson) using M6 KASPar assay. Artificial Het - W82:HN063 (1:1 ratio).

| RIL                   | LSS | Genotype call | Genotype vs Phenotype |
|-----------------------|-----|---------------|-----------------------|
| <b>W82</b>            | 4.3 | WT            | Matched               |
| <b>Artificial HET</b> | -   | HET           | Matched               |
| <b>HN063</b>          | 1   | MUT           | Matched               |
| <b>H20</b>            | -   | -             | -                     |
| RIL4                  | 4.1 | WT            | Matched               |
| RIL5                  | 1.4 | MUT           | Matched               |
| RIL6                  | 2.1 | MUT           | Matched               |
| RIL9                  | 1.5 | MUT           | Matched               |
| RIL12                 | 1.6 | MUT           | Matched               |
| RIL14                 | 1.4 | MUT           | Matched               |
| RIL15                 | 2.4 | MUT           | Matched               |
| RIL18                 | 1.1 | WT            | Not Matched           |
| RIL19                 | 2.1 | MUT           | Matched               |
| RIL23                 | 4.4 | WT            | Matched               |
| RIL25                 | 3.5 | WT            | Matched               |
| RIL26                 | 2.9 | WT            | Matched               |
| RIL28                 | 3.2 | WT            | Matched               |
| RIL29                 | 3.0 | WT            | Matched               |
| RIL30                 | 1.1 | MUT           | Matched               |
| RIL31                 | 1.3 | MUT           | Matched               |
| RIL32                 | 2.0 | MUT           | Matched               |
| RIL34                 | 1.9 | MUT           | Matched               |
| RIL35                 | 2.0 | HET           | Matched               |
| RIL36                 | 1.6 | MUT           | Matched               |
| RIL37                 | 3.7 | WT            | Matched               |
| RIL39                 | 1.3 | MUT           | Matched               |
| RIL41                 | 1.7 | WT            | Not Matched           |
| RIL43                 | 1.1 | MUT           | Matched               |
| RIL46                 | 1.1 | MUT           | Matched               |
| RIL48                 | 4.2 | WT            | Matched               |
| RIL49                 | 3.0 | WT            | Matched               |

|        |     |     |             |
|--------|-----|-----|-------------|
| RIL51  | 1.5 | MUT | Matched     |
| RIL53  | 2.2 | WT  | Not Matched |
| RIL56  | 4.0 | WT  | Matched     |
| RIL58  | 4.2 | WT  | Matched     |
| RIL59  | 4.1 | WT  | Matched     |
| RIL60  | 1.2 | MUT | Matched     |
| RIL61  | 1.7 | MUT | Matched     |
| RIL62  | 3.6 | WT  | Matched     |
| RIL63  | 3.0 | WT  | Matched     |
| RIL64  | 1.9 | WT  | Not Matched |
| RIL65  | 3.6 | WT  | Matched     |
| RIL66  | 1.7 | MUT | Matched     |
| RIL67  | 1.5 | MUT | Matched     |
| RIL70  | 1.4 | MUT | Matched     |
| RIL72  | 1.6 | MUT | Matched     |
| RIL74  | 3.9 | WT  | Matched     |
| RIL76  | 4.1 | WT  | Matched     |
| RIL77  | 3.8 | WT  | Matched     |
| RIL79  | 2.8 | WT  | Matched     |
| RIL86  | 2.4 | WT  | Not Matched |
| RIL87  | 1.3 | MUT | Matched     |
| RIL90  | 3.0 | WT  | Matched     |
| RIL91  | 1.8 | MUT | Matched     |
| RIL94  | 2.5 | MUT | Matched     |
| RIL97  | 1.3 | MUT | Matched     |
| RIL98  | 4.0 | WT  | Matched     |
| RIL101 | 3.4 | WT  | Matched     |
| RIL102 | 3.2 | WT  | Matched     |
| RIL110 | 3.2 | WT  | Matched     |
| RIL113 | 3.1 | WT  | Matched     |
| RIL122 | 3.9 | WT  | Matched     |
| RIL127 | 3.0 | WT  | Matched     |
| RIL129 | 2.9 | WT  | Matched     |
| RIL141 | 3.7 | WT  | Matched     |
| RIL143 | 3.3 | WT  | Matched     |
| RIL147 | 1.4 | MUT | Matched     |

|                                    |     |     |         |
|------------------------------------|-----|-----|---------|
| RIL149                             | 3.6 | WT  | Matched |
| RIL154                             | 3.2 | WT  | Matched |
| RIL157                             | 2.3 | HET | Matched |
| RIL160                             | 3.5 | WT  | Matched |
| RIL161                             | 1.6 | MUT | Matched |
| RIL163                             | 3.9 | WT  | Matched |
| RIL168                             | 1.3 | MUT | Matched |
| RIL169                             | 3.6 | WT  | Matched |
| RIL170                             | 4.0 | WT  | Matched |
| RIL172                             | 3.8 | WT  | Matched |
| RIL173                             | 2.9 | MUT | Matched |
| RIL176                             | 3.2 | WT  | Matched |
| RIL181                             | 3.5 | WT  | Matched |
| RIL182                             | 1.8 | MUT | Matched |
| RIL184                             | 2.2 | MUT | Matched |
| RIL188                             | 1.3 | MUT | Matched |
| RIL189                             | 3.0 | WT  | Matched |
| RIL191                             | 1.7 | MUT | Matched |
| RIL192                             | 3.2 | WT  | Matched |
| RIL193                             | 3.2 | WT  | Matched |
| RIL196                             | 3.3 | WT  | Matched |
| RIL199                             | 4.3 | WT  | Matched |
| RIL200                             | 2.8 | MUT | Matched |
| RIL207                             | 3.0 | WT  | Matched |
| RIL216                             | 3.2 | WT  | Matched |
| RIL218                             | 2.8 | WT  | Matched |
| RIL228                             | 3.3 | MUT | Matched |
| <b>HN063</b><br><b>(PI 483463)</b> | 1.0 | MUT | Matched |
| <b>HN001</b><br><b>(Hutcheson)</b> | 4.8 | WT  | Matched |

**Supplementary Table S6:** KASPar assay primer sequence information. Marker allele labelled with FAM (wild-type) and HEX (mutant type) fluorescence dye.

| Marker | Fluorescent primer    | Sequence                                                                              |
|--------|-----------------------|---------------------------------------------------------------------------------------|
| M1     | FAM_primer            | ACCAAACCAAACCTAGCTAGTTTTATCACCTTCCTATGATTGTTTTGTTTTAATTTCTAACTAACTAACACAGCAA <b>G</b> |
|        | HEX_primer            | ACCAAACCAAACCTAGCTAGTTTTATCACCTTCCTATGATTGTTTTGTTTTAATTTCTAACTAACTAACACAGCAA <b>C</b> |
|        | Common Reverse primer | AAGCACTGAGTCTTTGGCCATGACGTTCAACGCGAGCACCATCACAACGGCGTCGGA                             |
| M2     | FAM_primer            | AAGCACTGAGTCTTTGGCCATGACGTTCAACGCGAGCACCATCACAACGGCGTCGGAA <b>A</b>                   |
|        | HEX_primer            | AAGCACTGAGTCTTTGGCCATGACGTTCAACGCGAGCACCATCACAACGGCGTCGGAT <b>T</b>                   |
|        | Common Reverse primer | GGAGCCTGGCAGGGCGATAATCCYCTGAACCACGCTCTTCCTTTGTTGATCGTTCAAACCATCCTCGTAGTCTTCG          |
| M3     | FAM_primer            | TAATCGTTCTCAATATTGGCAGAGAGAAGAAGGTGAGTTATGCTTTACATTGCTATTGATGTAGTAGTAAT <b>T</b>      |
|        | HEX_primer            | TAATCGTTCTCAATATTGGCAGAGAGAAGAAGGTGAGTTATGCTTTACATTGCTATTGATGTAGTAGTAAC <b>C</b>      |
|        | Common Reverse primer | TATACAAATATGTTGTTTTGTGTTATTCTACGATTATCATCATCTAGTT                                     |
| M4     | FAM_primer            | TATACAAATATGTTGTTTTGTGTTATTCTACGATTATCATCATCTAGTT <b>C</b>                            |
|        | HEX_primer            | TATACAAATATGTTGTTTTGTGTTATTCTACGATTATCATCATCTAGTT <b>G</b>                            |
|        | Common Reverse primer | AATGGTTAACTTTATCACATATTTATAGTTGAATATAAGTTAGTTTATTAATTTTCACTAAAAATTAAC                 |
| M5     | FAM_primer            | GGGGTTGCCAGAAGGTACGAACAAGAACCTGAGACAAGTGTGCTGCAAGGAAAAGAGTGTGCATAT <b>T</b>           |
|        | HEX_primer            | GGGGTTGCCAGAAGGTACGAACAAGAACCTGAGACAAGTGTGCTGCAAGGAAAAGAGTGTGCATA <b>A</b>            |
|        | Common Reverse primer | TTTTCATTGGTGGACCACATGATCGCAAGTTTTGGAGTTAGGTAGCAGAATGGCAGAGCATCCAGCAATTAGG             |
| M6     | FAM_primer            | GAGATCTCTTTGTCTCTTCGGGTAACGGCATTACCAGTTCATTGCTCGTTATACAGGACCGATATTT <b>G</b>          |
|        | HEX_primer            | GAGATCTCTTTGTCTCTTCGGGTAACGGCATTACCAGTTCATTGCTCGTTATACAGGACCGATATTT <b>T</b>          |
|        | Common Reverse primer | ATAAATTCAAACGAAAGTAATCTCGTTAAGACATCAAGGGCCGAGAGTACTGTGATTAAGATGCTATCGAAGAACTTTAA      |

**Supplementary Figure S1:** Effect of salt treatment on accumulation of Na<sup>+</sup> in soybean leaf tissue under normal (0 mM) and salt-treatment (120 mM NaCl) conditions. Tolerant (T); Sensitive (S).

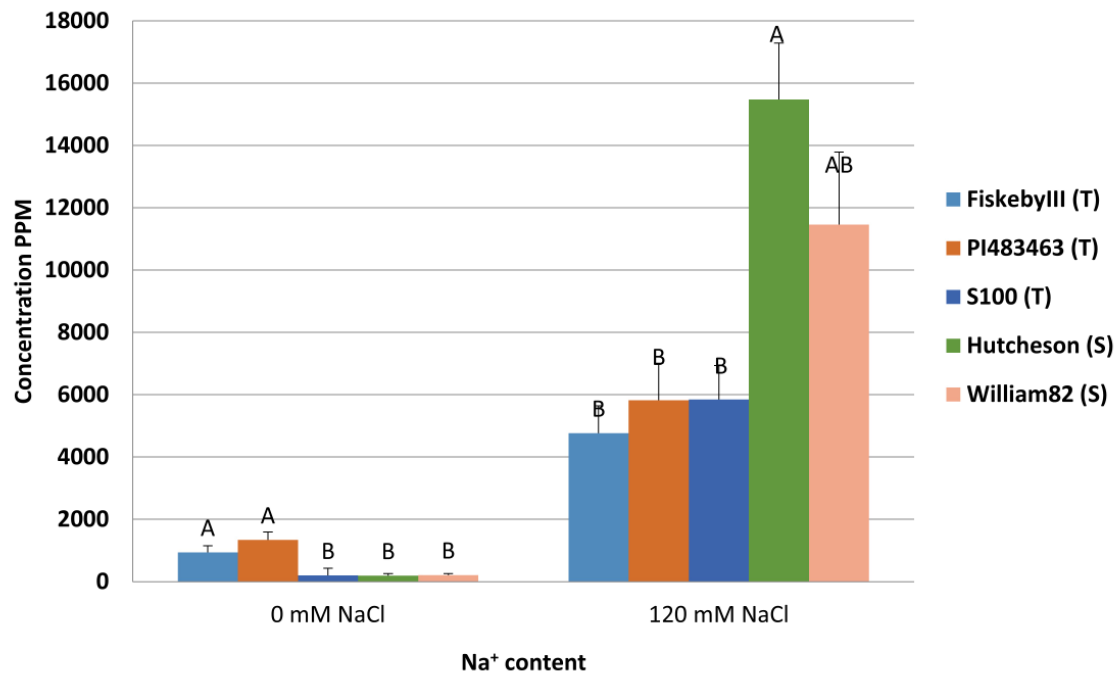

**Supplementary Figure S2:** Manhattan plots of GWAS for (A) LSS and, (B) SPAD ratio, in 106 soybean lines using SoySNP50K dataset. Negative  $\log_{10}$ -transformed  $P$  values of SNPs from genome-wide scan for salinity traits using EMMAX model including kinship and population structure are plotted against positions on each of the 20 chromosomes; (C) genes underlying significant trait-associated SNPs on Chr. 3.

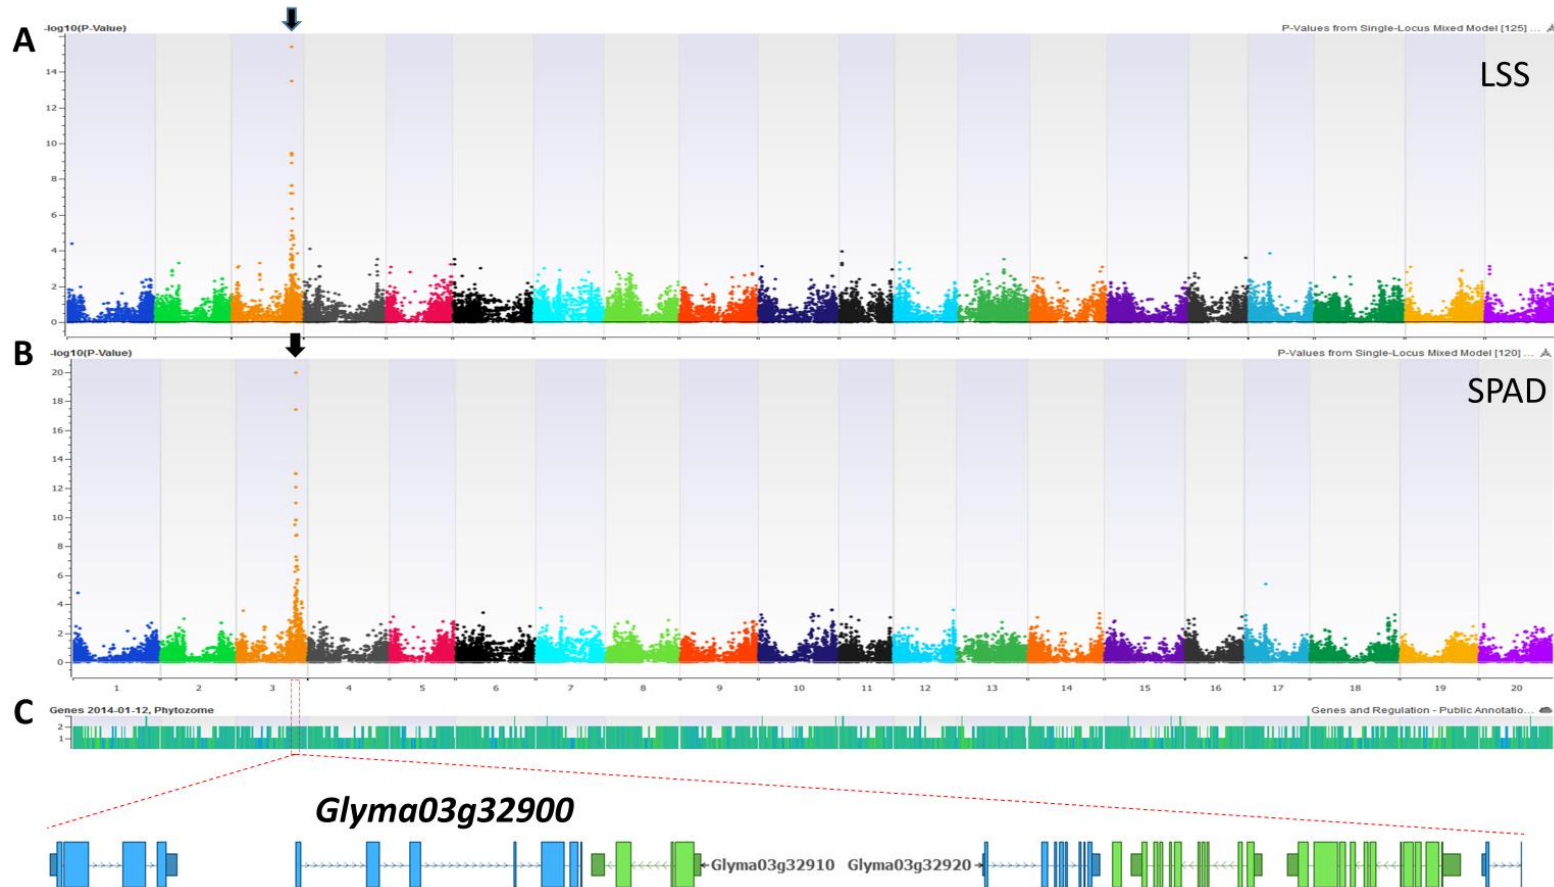



**Supplementary Figure S3:** Comparison of SNPs between SV-2 and SV-3 in promoter and coding regions of the gene *GmCHX1*.

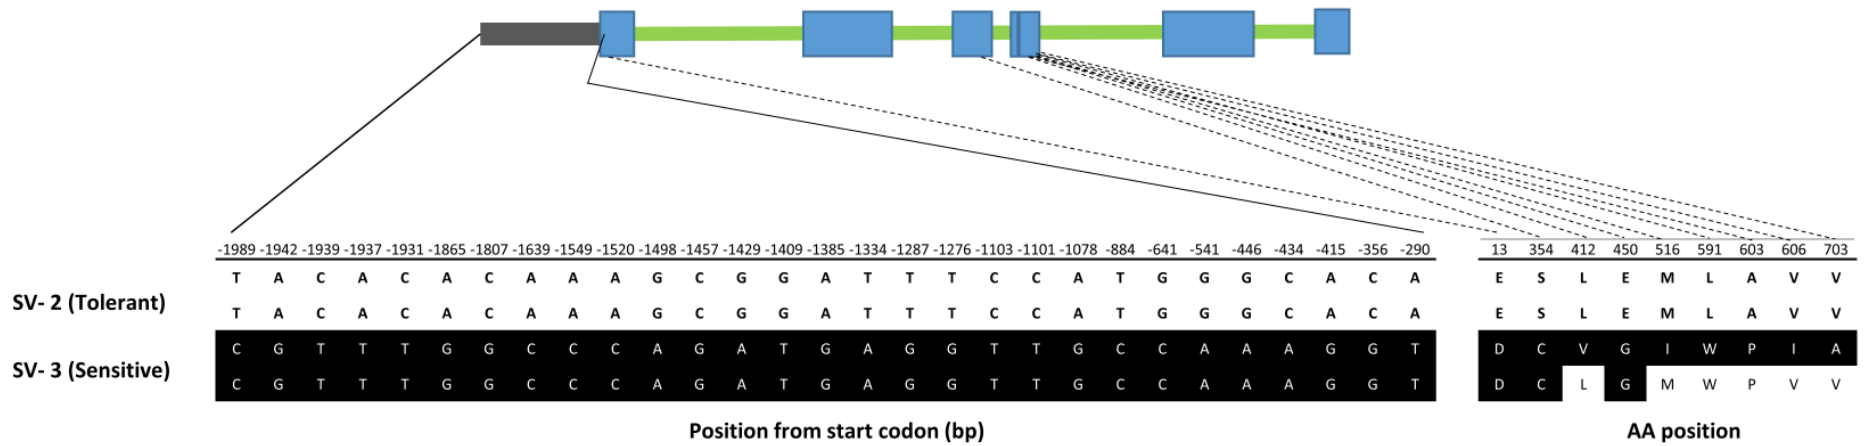

**Supplementary Figure S4: Haplotype analysis of 106 and 23 lines<sup>42</sup> WGRS data.** Base position identical to the reference (W82) are white, black – different, gray-missing data.

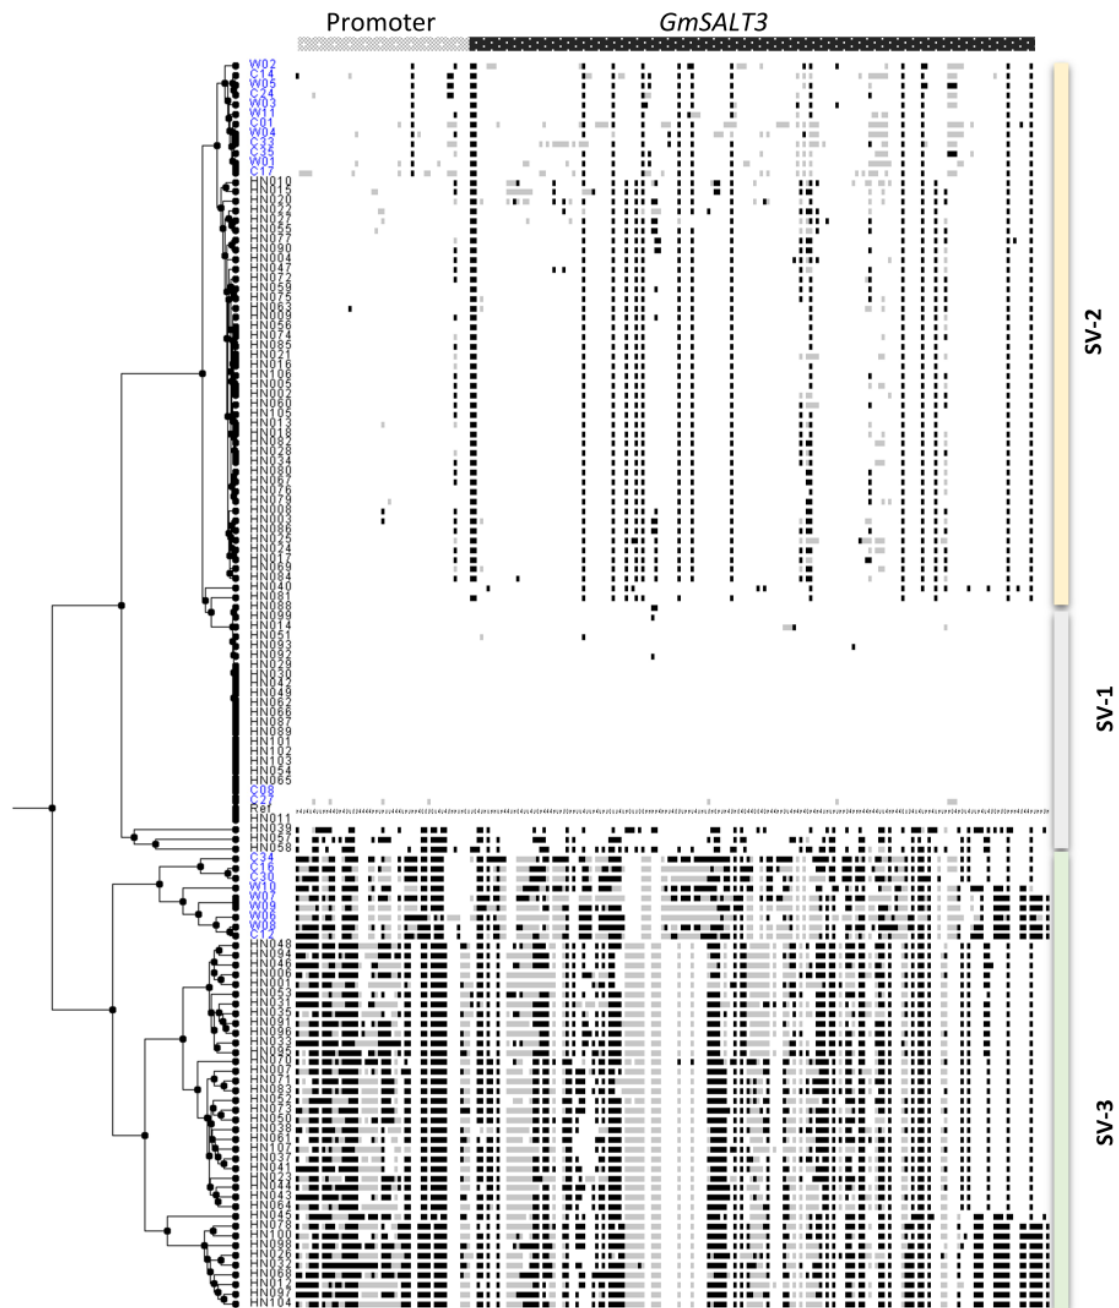

**Supplementary Figure S5:** GmCHX1 protein transmembrane helix prediction obtained using TMHMM 2.0 tool<sup>78</sup>. Arrow denotes deletion.

```

# WEBSEQUENCE Length: 811
# WEBSEQUENCE Number of predicted TMHs: 10
# WEBSEQUENCE Exp number of AAs in TMHs: 241.59121
# WEBSEQUENCE Exp number, first 60 AAs: 27.09195
# WEBSEQUENCE Total prob of N-in: 0.18346
# WEBSEQUENCE POSSIBLE N-term signal sequence
WEBSEQUENCE TMHMM2.0 outside 1 24
WEBSEQUENCE TMHMM2.0 THelix 25 47
WEBSEQUENCE TMHMM2.0 inside 48 53
WEBSEQUENCE TMHMM2.0 THelix 54 71
WEBSEQUENCE TMHMM2.0 outside 72 85
WEBSEQUENCE TMHMM2.0 THelix 86 108
WEBSEQUENCE TMHMM2.0 inside 109 119
WEBSEQUENCE TMHMM2.0 THelix 120 142
WEBSEQUENCE TMHMM2.0 outside 143 156
WEBSEQUENCE TMHMM2.0 THelix 157 179
WEBSEQUENCE TMHMM2.0 inside 180 191
WEBSEQUENCE TMHMM2.0 THelix 192 214
WEBSEQUENCE TMHMM2.0 outside 215 223 ← ~180 bp deletion in exon 3
WEBSEQUENCE TMHMM2.0 THelix 224 243
WEBSEQUENCE TMHMM2.0 inside 244 263
WEBSEQUENCE TMHMM2.0 THelix 264 286
WEBSEQUENCE TMHMM2.0 outside 287 342
WEBSEQUENCE TMHMM2.0 THelix 343 365
WEBSEQUENCE TMHMM2.0 inside 366 406
WEBSEQUENCE TMHMM2.0 THelix 407 429
WEBSEQUENCE TMHMM2.0 outside 430 811

```

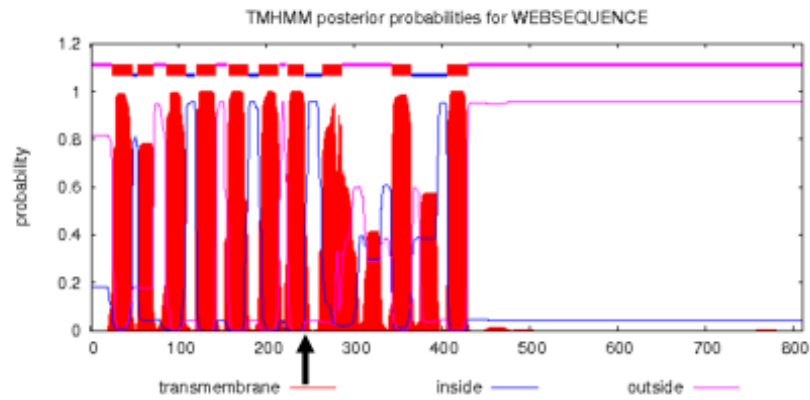

# [plot](#) in postscript, [script](#) for making the plot in gnuplot, [data](#) for plot
